# Supplementary material
Source: publisher figshare collection journal article supplement (https://acs.figshare.com/ndownloader/files/4796485)
Supplement: Supplementary file 1 [file 4796485]

# Supporting information

## Preparation and Characterization of Thermoregulated Rigid Polyurethane Foams Containing Nanoencapsulated Phase Change Materials

*Shuen Liang<sup>†,‡</sup>, Yalin Zhu<sup>‡,§</sup>, Hui Wang<sup>‡</sup>, Taiwen Wu<sup>‡</sup>, Chunrong Tian<sup>\*‡</sup>, Jianhua Wang<sup>‡</sup> and Ruke Bai<sup>\*†</sup>*

<sup>†</sup>CAS Key Laboratory of Soft Matter Chemistry, Department of Polymer Science and Engineering, University of Science and Technology of China, Hefei 230026, P. R. China

<sup>‡</sup>Institute of Chemical Materials, China Academy of Engineering Physics (CAEP), Mianyang 621900, P. R. China

<sup>§</sup>College of Material Science and Engineering, Southwest University of Science and Technology of China, Mianyang 621000, P. R. China

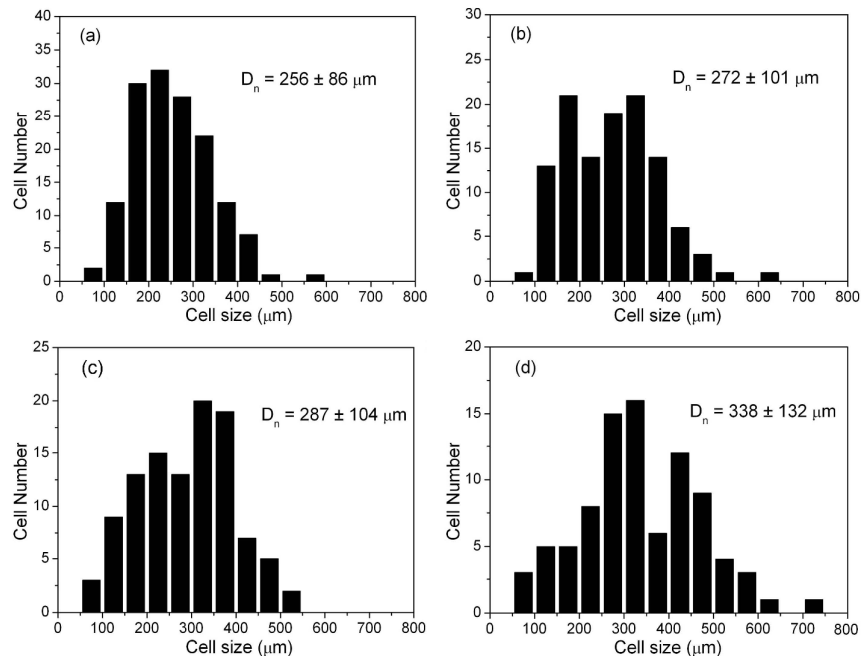

**Figure S1.** Cell size distribution of the RPU foams containing different contents of NanoPCMs: (a) pure RPU foam, (b) 4.04 wt%, (c) 11.22 wt%, (d) 17.40 wt%. Density of the foams:  $\sim 200 \text{ kg/m}^3$ .

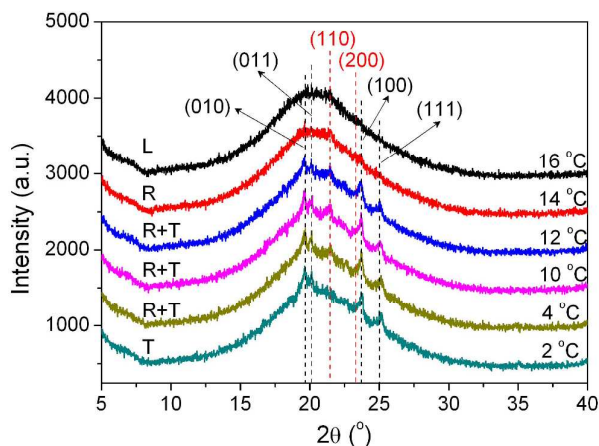

**Figure S2.** Temperature dependent XRD results of representative NanoPCMs/RPU composite foam during cooling process. T: triclinic crystal phase. L: liquid phase. R: rotator crystal phase. Density of the foam:  $\sim 200 \text{ g/cm}^3$ . Content of NanoPCMs in the composite foam: 11.22 wt%.

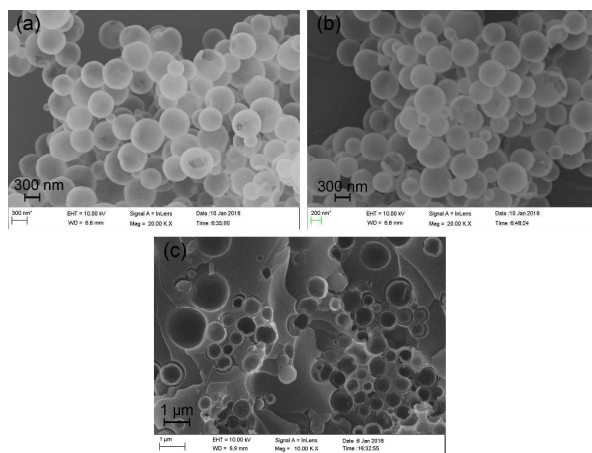

**Figure S3.** SEM images of the NanoPCMs (a) before and (b) after 50 melting/solidifying cycles and (c) representative NanoPCMs/RPU composite foam after thermal cycles. Density of the foam:  $\sim 200 \text{ g/cm}^3$ . Content of NanoPCMs in the composite foam: 11.22 wt%.
